# Supplementary material
Source: PubMed Central journal article supplement (PMC5878058)
Supplement: NIHMS886311-supplement-Figures.pdf [file NIHMS886311-supplement-Figures.pdf]

SUPPORTING INFORMATION FOR THE SOCIAL ECOLOGY OF PUBLIC SPACE:

ACTIVE STREETS AND VIOLENT CRIME IN URBAN NEIGHBORHOODS\*

CHRISTOPHER R. BROWNING

AUBREY JACKSON

---

\* \* Published in *Criminology*, volume 51, issue 4, 2013.

**Figure S.1. Predicted Probability of Exposure to Severe Violence by Spline Specification of Proportion of Active Streets**

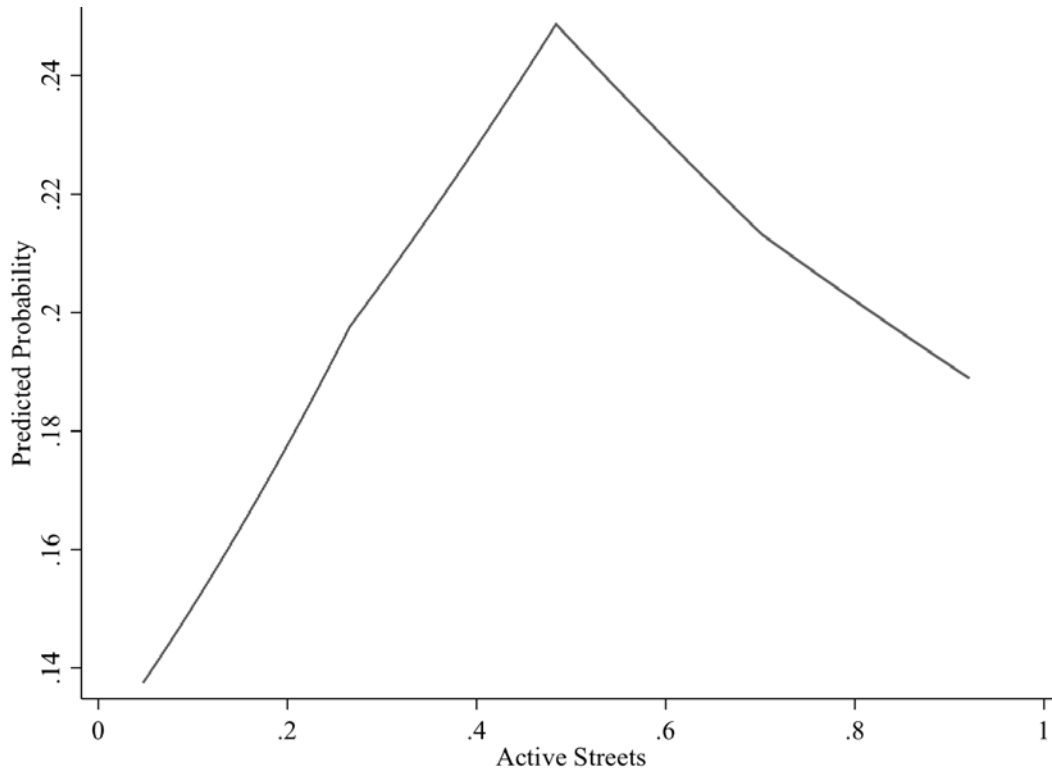

*Notes:* Splines are equally spaced at four intervals across the range of active streets. Predictions are based on results from a model otherwise analogous to model 4 in table 2 in the main article and refer to the probability of witnessing someone attacked with a weapon (i.e., the omitted item at level one); all other variables are held at their grand means.

**Figure S.2. Predicted Probability of Exposure to Severe Violence by Average Active Block Faces Per Block-Face Dyad**

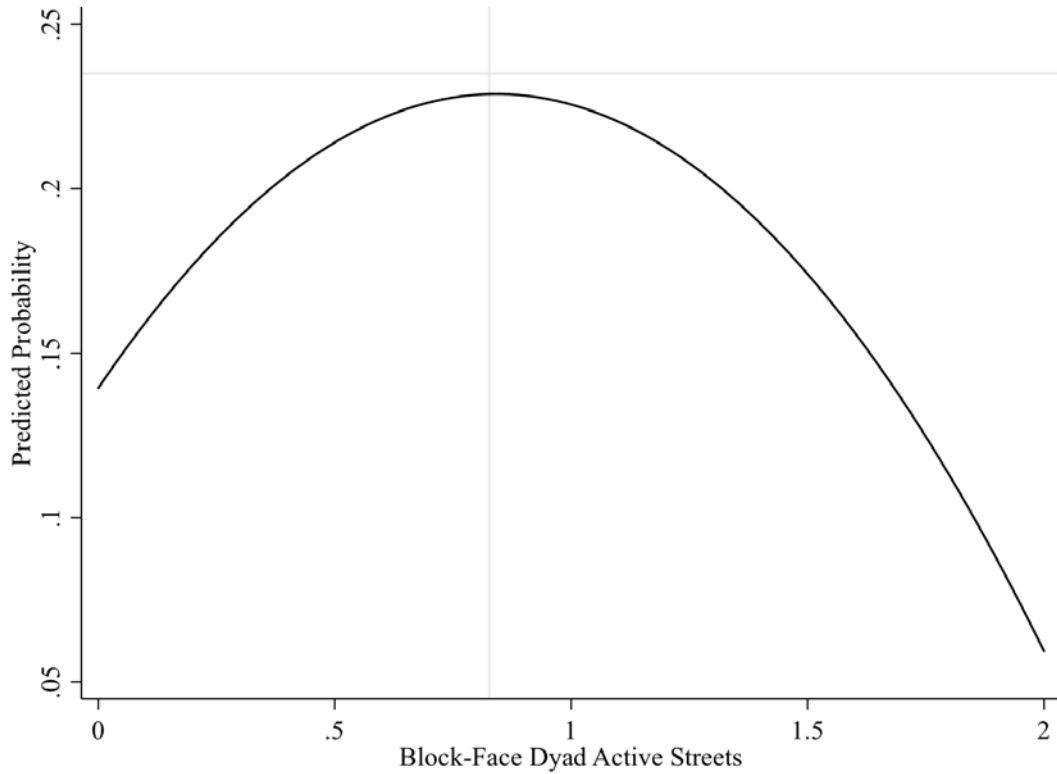

*Notes:* Predictions are based on results from a model otherwise analogous to model 4 in table 2 in the main article and refer to the probability of witnessing someone attacked with a weapon (i.e., the omitted item at level one); all other variables are held at their grand means.
